# Supplementary material
Source: PubMed Central journal article supplement (PMC3400450)

## SUPPLEMENTARY DATA

FIG. S1. Percentage germination of manually scarified seeds of *G. carolinianum* and *G. dissectum* at different constant temperatures after dry-storage at ambient room conditions.

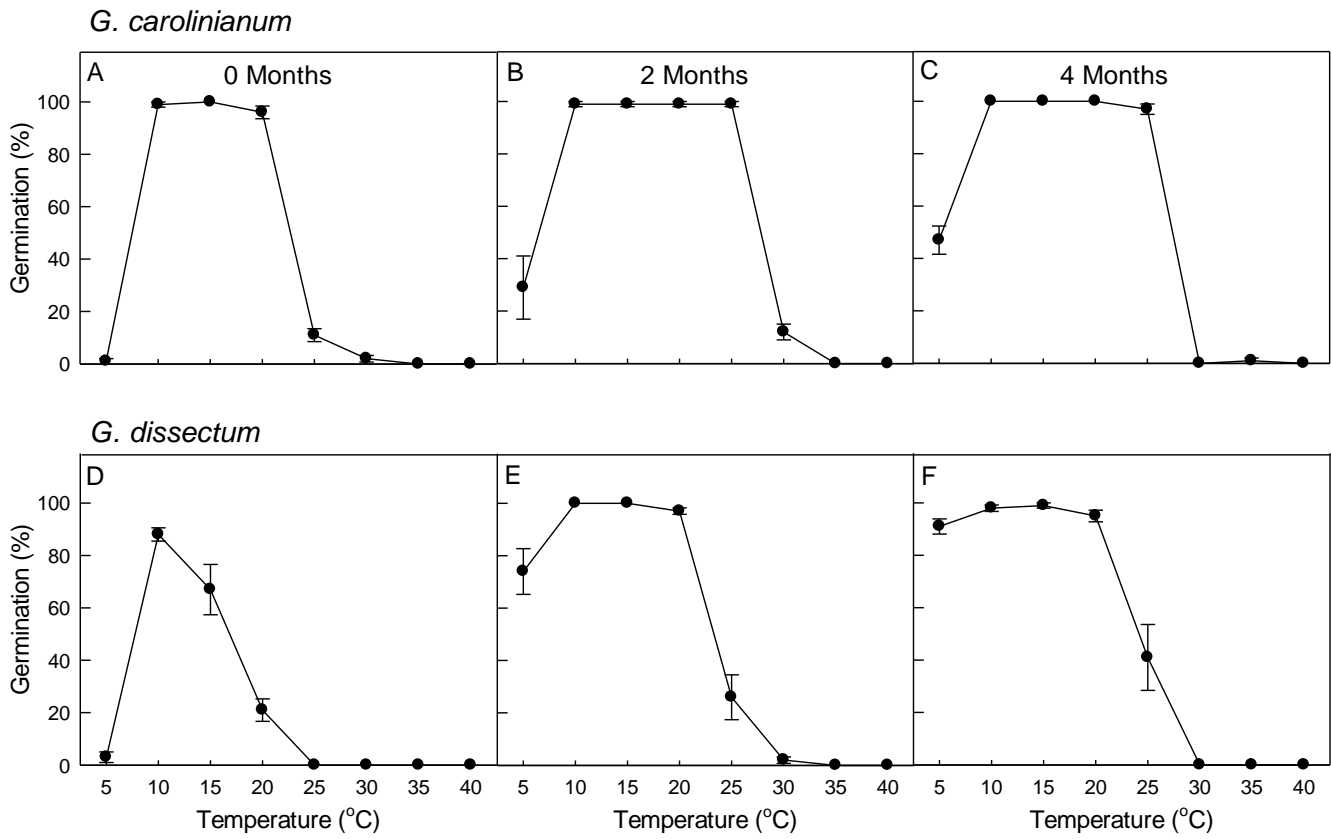

Supplement: supp_mcs122_mcs122supp.pdf [file supp_mcs122_mcs122supp.pdf]
